# Supplementary material
Source: Springer Nature journal article supplement (https://www.springermedizin.de/resource/supplementary/12936_2008_547_MOESM3_ESM.pdf/9548260)
Supplement: MOESM3 [file 9548260]

| Country (n)   | TTAAA | TCAAA | TTAAA | TTAAG | TTAAA | TGAAA | TTAAA | TGAAA | 5' indel | 5' SNPs | <i>dhfr</i> genotype            | 3' SNPs         |
|---------------|-------|-------|-------|-------|-------|-------|-------|-------|----------|---------|---------------------------------|-----------------|
| Thailand (6)  | 1     | 4     | 1     | 1     | 4     | 4     |       |       | A        |         | 58R/117N                        |                 |
| Thailand (1)  | 1     | 4     | 1     | 1     | 4     | 4     |       |       | A        |         | 57I(171A,169A)/58R/61M/117T     | +223T           |
| Thailand (1)  | 1     | 5     | 9     |       |       | 7     |       |       | A        |         | 57I(171A,169A)/58R/61M/117T     | +223T           |
| Thailand (1)  | 1     | 6     | 8     |       |       | 7     |       |       | A        |         | 57I(171A,169A)/58R/61M/117T     | +223T           |
| Thailand (5)  | 1     | 6     | 9     |       |       | 7     |       |       | A        |         | 57I(171A,169A)/58R/61M/117T     | +223T           |
| Thailand (2)  | 1     | 6     | 9     |       |       | 7     |       |       | A        |         | 57I(171A,169A)/58R/61M/117T     | +223T           |
| Indonesia (5) | 1     | 3     | 5     |       |       | 1     | 1     | 2     | A        | -581A   | 57L(169C)/58R/61M/117T          | +383 insert TTT |
| Indonesia (2) | 1     | 3     | 5     |       |       | 1     | 1     | 2     | A        | -581A   | 57L(169C)/58R/61M/117T/indel 2  | +383 insert TTT |
| Indonesia (1) | 1     | 9     | 4     |       |       | 4     |       |       | A        |         | 57L(169C)/58R/61M/117T/indel 2  | +383 insert TTT |
| Vanuatu (1)   | 1     | 9     | 4     |       |       | 4     |       |       | B        | -633G   | 58R/117N/indel 2                |                 |
| Vanuatu (2)   | 1     | 6     | 4     |       |       | 4     |       |       | A        |         | 58R/61M/117T/indel 2            |                 |
| Vanuatu (1)   | 1     | 6     | 4     |       |       | 4     |       |       | B        |         | 58R/61M/117T/indel 2            |                 |
| Vanuatu (1)   | 1     | 8     | 4     |       |       | 4     |       |       | A        |         | 58R/61M/117T/indel 2            |                 |
| Vanuatu (1)   | 1     | 8     | 4     |       |       | 4     |       |       | B        |         | 58R/61M/117T/indel 2            |                 |
| Vanuatu (1)   | 1     | 6     | 4     |       |       | 4     |       |       | B        |         | 57L(171C)/58R/117T/173F/indel 2 |                 |
| PNG (1)       | 1     | 5     | 5     |       |       | 6     |       |       | A        |         | 57L(171C)/58R/indel 3           |                 |
| PNG (2)       | 1     | 5     | 7     |       |       | 4     |       |       | A        |         | 57L(171C)/58R/61M/117T/indel3   |                 |
| PNG (1)       | 1     | 5     | 7     |       |       | 4     |       |       | A        | -581A   | 57L(171C)/58R/61M/117T/indel3   |                 |
| PNG (1)       | 1     | 5     | 7     |       |       | 4     |       |       | B        |         | 57L(171C)/58R/61M/117T/indel3   |                 |
| PNG (1)       | 1     | 5     | 6     |       |       | 4     |       |       | A        |         | 57L(171C)/58R/61M/117T/indel3   |                 |
| PNG (1)       | 1     | 8     | 4     |       |       | 4     |       |       | A        |         | 57L(171C)/58R/61M/117T/indel3   |                 |
